# Supplementary material for: Change Points in the Population Trends of Aerial-Insectivorous Birds in North America: Synchronized in Time across Species and Regions
Source: PLoS One. 2015 Jul 6;10(7):e0130768. doi: 10.1371/journal.pone.0130768 (PMC4493114; doi:10.1371/journal.pone.0130768)
Supplement: S1 Table — Including model DIC values and timing of group-level change points. (XLSX) [file pone.0130768.s003.xlsx]

## Sheet: Stratum level suppl data
						SSN - swallows, swifts, and nightjars										FC - flycatchers										Species inclusion table
						Negative Change Points					Positive Change Points					Negative Change Points					Positive Change Points					SSN - swallows, swifts, and nightjars								FC - flycatchers
Stratum (Country - Province/State/Territory - Bird Conservation Region)	DIC Ms	DIC MAllAI	DIC MFC,SSN	DIC MFC	DIC MSSN	Year with max probability of negative change point SSN	Max annual posterior probability of negative change point SSN	Sum of posterior probability of negative change point across all years with strong support SSN	Earliest year with strong support for negative change point SSN	Latest year with strong support of negative change point SSN	Year with max probability of positive change point SSN	Max annual posterior probability of positive change point SSN	Sum of posterior probability of positive change point across all years with strong support SSN	Earliest year with strong support for positive change point SSN	Latest year with strong support of positive change point SSN	Year with max probability of negative change point FC	Max annual posterior probability of negative change point FC	Sum of posterior probability of negative change point across all years with strong support FC	Earliest year with strong support for negative change point FC	Latest year with strong support of negative change point FC	Year with max probability of positive change point FC	Max annual posterior probability of positive change point FC	Sum of posterior probability of positive change point across all years with strong support FC	Earliest year with strong support for positive change point FC	Latest year with strong support of positive change point FC	Common Nighthawk	Whip-poor-will	Chimney Swift	Purple Martin	Tree Swallow	Violet-green Swallow	Northern Rough-winged Swallow	Barn Swallow	Olive-sided Flycatcher	Western Wood-Pewee	Eastern Wood-Pewee	Yellow-bellied Flycatcher	Acadian Flycatcher	Alder Flycatcher	Willow Flycatcher	Least Flycatcher	Pacific-slope Flycatcher	Eastern Phoebe	Say's Phoebe	Great Crested Flycatcher	Western Kingbird	Eastern Kingbird
CA-AB-10	-471.534	-465.538	-466.96	-468.141	-470.252	2000	0.015	NA	NA	NA	2004	0.025	NA	NA	NA	2008	0.022	NA	NA	NA	2001	0.046	NA	NA	NA	FALSE	FALSE	FALSE	FALSE	TRUE	TRUE	FALSE	TRUE	TRUE	TRUE	FALSE	FALSE	FALSE	TRUE	TRUE	TRUE	FALSE	FALSE	FALSE	FALSE	FALSE	TRUE
CA-AB-11	-561.144	-544.771	-550.616	-556.305	-556.287	1987	0.197	0.748	1983	1988	2004	0.019	NA	NA	NA	1993	0.033	NA	NA	NA	1972	0.006	NA	NA	NA	TRUE	FALSE	FALSE	TRUE	TRUE	FALSE	FALSE	TRUE	FALSE	TRUE	FALSE	FALSE	FALSE	TRUE	FALSE	TRUE	FALSE	TRUE	TRUE	FALSE	TRUE	TRUE
CA-AB-6	-486.566	-467.808	-482.223	-481.016	-488.638	1999	0.223	0.586	1998	2000	2004	0.633	0.893	2003	2005	1994	0.141	0.577	1993	1997	1972	0.003	NA	NA	NA	FALSE	FALSE	FALSE	FALSE	TRUE	FALSE	FALSE	TRUE	TRUE	TRUE	FALSE	FALSE	FALSE	TRUE	FALSE	TRUE	FALSE	TRUE	FALSE	FALSE	FALSE	TRUE
CA-BC-10	-832.274	-808.529	-808.62	-829.716	-811.43	1983	0.065	NA	NA	NA	2002	0.036	NA	NA	NA	2008	0.035	NA	NA	NA	2001	0.173	0.679	1998	2002	TRUE	FALSE	FALSE	FALSE	TRUE	TRUE	TRUE	TRUE	TRUE	TRUE	FALSE	FALSE	FALSE	TRUE	TRUE	TRUE	TRUE	FALSE	FALSE	FALSE	TRUE	TRUE
CA-BC-5	-543.264	-548.913	-549.381	-551.321	-542.411	1987	0.045	NA	NA	NA	1972	0.008	NA	NA	NA	2008	0.105	0.366	2007	2010	2001	0.16	0.737	1998	2003	TRUE	FALSE	FALSE	FALSE	TRUE	TRUE	TRUE	TRUE	TRUE	TRUE	FALSE	FALSE	FALSE	FALSE	TRUE	FALSE	TRUE	FALSE	FALSE	FALSE	FALSE	FALSE
CA-BC-6	-293.781	-291.511	-290.207	-292.459	-292.742	1998	0.019	NA	NA	NA	2004	0.022	NA	NA	NA	1972	0.021	NA	NA	NA	2004	0.005	NA	NA	NA	FALSE	FALSE	FALSE	FALSE	TRUE	FALSE	FALSE	TRUE	TRUE	TRUE	FALSE	FALSE	FALSE	TRUE	FALSE	TRUE	FALSE	TRUE	FALSE	FALSE	FALSE	FALSE
CA-BC-9	-694.946	-690.775	-692.32	-702.109	-686.184	1987	0.025	NA	NA	NA	1972	0.008	NA	NA	NA	2008	0.246	0.664	2006	2010	2001	0.292	0.921	1999	2003	TRUE	FALSE	FALSE	FALSE	TRUE	TRUE	TRUE	TRUE	TRUE	TRUE	FALSE	FALSE	FALSE	FALSE	TRUE	FALSE	TRUE	FALSE	TRUE	FALSE	TRUE	TRUE
CA-BCR7	NA	NA	NA	NA	NA	NA	NA	NA	NA	NA	NA	NA	NA	NA	NA	NA	NA	NA	NA	NA	NA	NA	NA	NA	NA	FALSE	FALSE	FALSE	FALSE	FALSE	FALSE	FALSE	FALSE	FALSE	FALSE	FALSE	FALSE	FALSE	FALSE	FALSE	FALSE	FALSE	FALSE	FALSE	FALSE	FALSE	FALSE
CA-MB-11	-621.069	-613.607	-611.641	-612.666	-620.309	1972	0.019	NA	NA	NA	2010	0.015	NA	NA	NA	1993	0.046	NA	NA	NA	1972	0.008	NA	NA	NA	TRUE	FALSE	FALSE	TRUE	TRUE	FALSE	FALSE	TRUE	FALSE	FALSE	TRUE	FALSE	FALSE	TRUE	TRUE	TRUE	FALSE	TRUE	TRUE	TRUE	TRUE	TRUE
CA-MB-12	-491.539	-496.24	-493.67	-495.258	-490.682	1983	0.031	NA	NA	NA	2010	0.012	NA	NA	NA	1993	0.223	0.736	1991	1995	1974	0.042	NA	NA	NA	FALSE	FALSE	FALSE	TRUE	TRUE	FALSE	FALSE	TRUE	TRUE	FALSE	TRUE	FALSE	FALSE	TRUE	FALSE	TRUE	FALSE	TRUE	FALSE	TRUE	TRUE	TRUE
CA-MB-6	-481.58	-472.644	-477.724	-483.669	-476.347	1974	0.032	NA	NA	NA	2004	0.016	NA	NA	NA	1993	0.305	0.884	1991	1994	1974	0.024	NA	NA	NA	FALSE	FALSE	FALSE	TRUE	TRUE	FALSE	FALSE	TRUE	TRUE	FALSE	TRUE	FALSE	FALSE	TRUE	FALSE	TRUE	FALSE	TRUE	FALSE	TRUE	TRUE	TRUE
CA-MB-8	-221.019	-225.337	-221.225	-221.299	-219.971	1983	0.016	NA	NA	NA	2010	0.018	NA	NA	NA	1994	0.066	NA	NA	NA	1973	0.011	NA	NA	NA	FALSE	FALSE	FALSE	FALSE	TRUE	FALSE	FALSE	TRUE	TRUE	FALSE	FALSE	TRUE	FALSE	TRUE	FALSE	TRUE	FALSE	TRUE	FALSE	FALSE	FALSE	FALSE
CA-NB-14	-306.081	-316.961	-308.856	-303.804	-309.789	1986	0.238	0.62	1972	1987	2009	0.003	NA	NA	NA	1984	0.25	0.39	1984	1988	1979	0.217	0.356	1978	1979	TRUE	FALSE	TRUE	FALSE	TRUE	FALSE	FALSE	TRUE	TRUE	FALSE	TRUE	TRUE	FALSE	TRUE	FALSE	TRUE	FALSE	TRUE	FALSE	FALSE	FALSE	TRUE
CA-NT-6	NA	NA	NA	NA	NA	NA	NA	NA	NA	NA	NA	NA	NA	NA	NA	NA	NA	NA	NA	NA	NA	NA	NA	NA	NA	FALSE	FALSE	FALSE	FALSE	FALSE	FALSE	FALSE	FALSE	FALSE	FALSE	FALSE	FALSE	FALSE	FALSE	FALSE	FALSE	FALSE	FALSE	FALSE	FALSE	FALSE	FALSE
CA-ON-12	-728.753	-727.991	-726.956	-725.709	-730.898	1988	0.235	0.792	1986	1990	2010	0.011	NA	NA	NA	1993	0.178	0.596	1991	1994	1975	0.093	0.255	1974	1976	TRUE	TRUE	TRUE	TRUE	TRUE	FALSE	FALSE	TRUE	TRUE	FALSE	TRUE	TRUE	FALSE	TRUE	FALSE	TRUE	FALSE	TRUE	FALSE	TRUE	FALSE	TRUE
CA-ON-13	-870.134	-900.32	-891.066	-886.303	-875.229	1984	0.169	0.652	1983	1987	1974	0.012	NA	NA	NA	1984	0.336	0.766	1983	1986	1976	0.373	0.769	1974	1976	TRUE	TRUE	TRUE	TRUE	TRUE	FALSE	TRUE	TRUE	FALSE	FALSE	TRUE	FALSE	FALSE	TRUE	TRUE	TRUE	FALSE	TRUE	FALSE	TRUE	FALSE	TRUE
CA-ON-8	-225.275	-228.319	-224.798	-226.112	-224.145	1986	0.07	0.07	1986	1986	2010	0.01	NA	NA	NA	1993	0.093	0.347	1991	1994	1973	0.007	NA	NA	NA	FALSE	FALSE	FALSE	FALSE	TRUE	FALSE	FALSE	TRUE	TRUE	FALSE	FALSE	FALSE	FALSE	TRUE	FALSE	TRUE	FALSE	FALSE	FALSE	FALSE	FALSE	FALSE
CA-PENS-14	-139.747	-151.365	-139.079	-138.48	-140.562	1984	0.141	0.332	1984	1986	1977	0.23	0.444	1976	1977	1998	0.117	0.32	1998	2000	1978	0.012	NA	NA	NA	TRUE	FALSE	TRUE	FALSE	TRUE	FALSE	FALSE	TRUE	TRUE	FALSE	TRUE	TRUE	FALSE	TRUE	FALSE	TRUE	FALSE	FALSE	FALSE	FALSE	FALSE	FALSE
CA-QC-12	-508.552	-511.474	-505.571	-509.886	-506.475	1989	0.074	0.074	1989	1989	2010	0.027	NA	NA	NA	1992	0.108	0.716	1984	1993	1975	0.109	0.287	1974	1976	FALSE	FALSE	FALSE	FALSE	TRUE	FALSE	FALSE	TRUE	TRUE	FALSE	TRUE	TRUE	FALSE	TRUE	FALSE	TRUE	FALSE	TRUE	FALSE	TRUE	FALSE	TRUE
CA-QC-13	-749.912	-772.608	-762.293	-763.433	-749.064	1986	0.054	NA	NA	NA	1976	0.014	NA	NA	NA	1984	0.378	0.776	1983	1986	1976	0.362	0.714	1975	1978	FALSE	FALSE	TRUE	TRUE	TRUE	FALSE	TRUE	TRUE	FALSE	FALSE	TRUE	FALSE	FALSE	TRUE	TRUE	TRUE	FALSE	TRUE	FALSE	TRUE	FALSE	TRUE
CA-QC-14	-578.415	-586.851	-583.828	-585.051	-577.008	1986	0.11	0.355	1984	1987	2009	0.019	NA	NA	NA	1984	0.543	0.855	1983	1985	1978	0.31	0.818	1976	1979	FALSE	FALSE	TRUE	FALSE	TRUE	FALSE	FALSE	TRUE	TRUE	FALSE	TRUE	TRUE	FALSE	TRUE	FALSE	TRUE	FALSE	TRUE	FALSE	TRUE	FALSE	TRUE
CA-QC-8	NA	NA	NA	NA	NA	NA	NA	NA	NA	NA	NA	NA	NA	NA	NA	NA	NA	NA	NA	NA	NA	NA	NA	NA	NA	FALSE	FALSE	FALSE	FALSE	FALSE	FALSE	FALSE	FALSE	FALSE	FALSE	FALSE	FALSE	FALSE	FALSE	FALSE	FALSE	FALSE	FALSE	FALSE	FALSE	FALSE	FALSE
CA-SK-11	-464.498	-452.97	-465.906	-469.376	-461.526	1979	0.12	0.534	1977	1981	2004	0.025	NA	NA	NA	1993	0.336	0.888	1991	1994	2006	0.017	NA	NA	NA	FALSE	FALSE	FALSE	TRUE	TRUE	FALSE	FALSE	TRUE	FALSE	FALSE	FALSE	FALSE	FALSE	TRUE	FALSE	TRUE	FALSE	TRUE	FALSE	TRUE	TRUE	TRUE
CA-SK-6	-410.794	-402.452	-401.781	-406.786	-404.622	2000	0.02	NA	NA	NA	2004	0.047	NA	NA	NA	1993	0.231	0.83	1992	1996	1976	0.004	NA	NA	NA	FALSE	FALSE	FALSE	TRUE	TRUE	FALSE	FALSE	TRUE	FALSE	TRUE	FALSE	FALSE	FALSE	TRUE	FALSE	TRUE	FALSE	TRUE	FALSE	TRUE	FALSE	TRUE
CA-YT-4	-223.347	-221.274	-219.398	-220.442	-222.192	2010	0.013	NA	NA	NA	1973	0.016	NA	NA	NA	2010	0.017	NA	NA	NA	2003	0.011	NA	NA	NA	FALSE	FALSE	FALSE	FALSE	TRUE	TRUE	FALSE	FALSE	TRUE	TRUE	FALSE	FALSE	FALSE	TRUE	FALSE	TRUE	FALSE	FALSE	FALSE	FALSE	FALSE	FALSE
US-AK-2	NA	NA	NA	NA	NA	NA	NA	NA	NA	NA	NA	NA	NA	NA	NA	NA	NA	NA	NA	NA	NA	NA	NA	NA	NA	FALSE	FALSE	FALSE	FALSE	FALSE	FALSE	FALSE	FALSE	FALSE	FALSE	FALSE	FALSE	FALSE	FALSE	FALSE	FALSE	FALSE	FALSE	FALSE	FALSE	FALSE	FALSE
US-AK-4	-178.187	-177.434	-176.381	-178.156	-176.856	2008	0.024	NA	NA	NA	1972	0.012	NA	NA	NA	2008	0.068	NA	NA	NA	2004	0.019	NA	NA	NA	FALSE	FALSE	FALSE	FALSE	TRUE	TRUE	FALSE	FALSE	TRUE	TRUE	FALSE	FALSE	FALSE	TRUE	FALSE	FALSE	FALSE	FALSE	FALSE	FALSE	FALSE	FALSE
US-AK-5	-169.287	-169.65	-169.134	-169.866	-168.267	2009	0.011	NA	NA	NA	1972	0.009	NA	NA	NA	2010	0.016	NA	NA	NA	2002	0.013	NA	NA	NA	FALSE	FALSE	FALSE	FALSE	TRUE	TRUE	FALSE	TRUE	TRUE	TRUE	FALSE	FALSE	FALSE	TRUE	FALSE	FALSE	TRUE	FALSE	FALSE	FALSE	FALSE	FALSE
US-AL-24	-625.286	-628.755	-635.263	-624.797	-635.89	1983	0.224	0.8	1981	1985	1972	0.006	NA	NA	NA	1992	0.012	NA	NA	NA	1973	0.028	NA	NA	NA	FALSE	FALSE	TRUE	TRUE	FALSE	FALSE	TRUE	TRUE	FALSE	FALSE	TRUE	FALSE	TRUE	FALSE	FALSE	FALSE	FALSE	TRUE	FALSE	TRUE	FALSE	TRUE
US-AL-27	-913.136	-913.6	-915.417	-910.952	-917.278	1986	0.28	0.87	1984	1988	1972	0.004	NA	NA	NA	1992	0.161	0.559	1990	1994	1975	0.14	0.256	1974	1975	TRUE	TRUE	TRUE	TRUE	FALSE	FALSE	TRUE	TRUE	FALSE	FALSE	TRUE	FALSE	TRUE	FALSE	FALSE	FALSE	FALSE	TRUE	FALSE	TRUE	FALSE	TRUE
US-AL-28	-849.002	-853.014	-854.038	-847.649	-854.948	1985	0.231	0.862	1983	1987	1972	0.006	NA	NA	NA	1980	0.026	NA	NA	NA	1975	0.087	0.087	1975	1975	TRUE	TRUE	TRUE	TRUE	FALSE	FALSE	TRUE	TRUE	FALSE	FALSE	TRUE	FALSE	TRUE	FALSE	FALSE	FALSE	FALSE	TRUE	FALSE	TRUE	FALSE	TRUE
US-AL-29	-523.773	-520.149	-521.98	-522.571	-522.093	1986	0.145	0.557	1983	1987	2010	0.011	NA	NA	NA	1991	0.026	NA	NA	NA	1973	0.049	NA	NA	NA	FALSE	FALSE	TRUE	TRUE	FALSE	FALSE	FALSE	TRUE	FALSE	FALSE	TRUE	FALSE	TRUE	FALSE	FALSE	FALSE	FALSE	TRUE	FALSE	TRUE	FALSE	TRUE
US-AR-24	-704.854	-707.184	-720.1	-708.418	-717.099	1983	0.252	0.859	1982	1986	1972	0.009	NA	NA	NA	1978	0.044	NA	NA	NA	1974	0.154	0.47	1973	1976	FALSE	TRUE	TRUE	TRUE	FALSE	FALSE	TRUE	TRUE	FALSE	FALSE	TRUE	FALSE	TRUE	FALSE	FALSE	FALSE	FALSE	TRUE	FALSE	TRUE	FALSE	TRUE
US-AR-25	-726.554	-720.807	-735.69	-723.897	-737.653	1984	0.209	0.804	1981	1985	1972	0.007	NA	NA	NA	1978	0.037	NA	NA	NA	1974	0.143	0.482	1973	1976	FALSE	TRUE	TRUE	TRUE	FALSE	FALSE	TRUE	TRUE	FALSE	FALSE	TRUE	FALSE	TRUE	FALSE	FALSE	FALSE	FALSE	TRUE	FALSE	TRUE	FALSE	TRUE
US-AR-26	-729.967	-732.099	-739.309	-729.777	-738.009	1983	0.269	0.87	1981	1985	1972	0.006	NA	NA	NA	1978	0.079	0.079	1978	1978	1974	0.144	0.485	1973	1976	FALSE	FALSE	TRUE	TRUE	FALSE	FALSE	TRUE	TRUE	FALSE	FALSE	TRUE	FALSE	TRUE	FALSE	FALSE	FALSE	FALSE	TRUE	FALSE	TRUE	FALSE	TRUE
US-AZ-16	NA	NA	NA	NA	NA	NA	NA	NA	NA	NA	NA	NA	NA	NA	NA	NA	NA	NA	NA	NA	NA	NA	NA	NA	NA	FALSE	FALSE	FALSE	FALSE	FALSE	FALSE	FALSE	FALSE	FALSE	FALSE	FALSE	FALSE	FALSE	FALSE	FALSE	FALSE	FALSE	FALSE	FALSE	FALSE	FALSE	FALSE
US-AZ-33	-221.293	-218.895	-216.864	-216.743	-221.442	1983	0.079	0.079	1983	1983	1972	0.009	NA	NA	NA	1975	0.032	NA	NA	NA	1990	0.012	NA	NA	NA	FALSE	FALSE	FALSE	FALSE	FALSE	FALSE	TRUE	TRUE	FALSE	FALSE	FALSE	FALSE	FALSE	FALSE	FALSE	FALSE	FALSE	FALSE	TRUE	FALSE	TRUE	FALSE
US-AZ-34	-333.344	-328.101	-324.777	-327.643	-329.295	1987	0.106	0.186	1987	1988	1972	0.01	NA	NA	NA	2010	0.019	NA	NA	NA	1999	0.033	NA	NA	NA	TRUE	FALSE	FALSE	TRUE	FALSE	TRUE	TRUE	TRUE	FALSE	TRUE	FALSE	FALSE	FALSE	FALSE	FALSE	FALSE	FALSE	FALSE	TRUE	FALSE	TRUE	FALSE
US-CA-15	-526.601	-528.056	-530.052	-529.447	-525.322	1987	0.044	NA	NA	NA	1972	0.012	NA	NA	NA	2008	0.012	NA	NA	NA	2000	0.176	0.644	1997	2001	TRUE	FALSE	FALSE	FALSE	TRUE	TRUE	TRUE	TRUE	TRUE	TRUE	FALSE	FALSE	FALSE	FALSE	TRUE	FALSE	TRUE	FALSE	FALSE	FALSE	TRUE	FALSE
US-CA-32	-467.884	-461.788	-460.373	-463.98	-463.562	2010	0.05	NA	NA	NA	1972	0.009	NA	NA	NA	1973	0.042	NA	NA	NA	2000	0.031	NA	NA	NA	FALSE	FALSE	FALSE	TRUE	TRUE	TRUE	TRUE	TRUE	TRUE	TRUE	FALSE	FALSE	FALSE	FALSE	FALSE	FALSE	TRUE	FALSE	TRUE	FALSE	TRUE	FALSE
US-CA-33	-327.229	-321.991	-327.763	-326.378	-328.391	1983	0.066	NA	NA	NA	1972	0.008	NA	NA	NA	1972	0.013	NA	NA	NA	2000	0.125	0.501	1997	2001	FALSE	FALSE	FALSE	FALSE	FALSE	FALSE	TRUE	TRUE	FALSE	TRUE	FALSE	FALSE	FALSE	FALSE	FALSE	FALSE	FALSE	FALSE	TRUE	FALSE	TRUE	FALSE
US-CA-5	-553.721	-553.934	-564.174	-567.409	-551.332	1987	0.042	NA	NA	NA	1972	0.009	NA	NA	NA	2010	0.068	0.068	2010	2010	2000	0.215	0.823	1997	2002	TRUE	FALSE	FALSE	TRUE	TRUE	TRUE	TRUE	TRUE	TRUE	TRUE	FALSE	FALSE	FALSE	FALSE	TRUE	FALSE	TRUE	FALSE	FALSE	FALSE	TRUE	FALSE
US-CA-9	-579.191	-579.56	-580.577	-581.094	-579.873	1987	0.101	0.179	1987	1988	1972	0.01	NA	NA	NA	2009	0.059	NA	NA	NA	2000	0.213	0.817	1997	2002	TRUE	FALSE	FALSE	FALSE	TRUE	TRUE	TRUE	TRUE	TRUE	TRUE	FALSE	FALSE	FALSE	FALSE	FALSE	FALSE	FALSE	FALSE	TRUE	FALSE	TRUE	FALSE
US-CO-10	-325.156	-318.038	-317.195	-321.981	-320.237	1987	0.127	0.305	1986	1988	1972	0.011	NA	NA	NA	1979	0.026	NA	NA	NA	2001	0.042	NA	NA	NA	TRUE	FALSE	FALSE	FALSE	FALSE	TRUE	TRUE	TRUE	FALSE	FALSE	FALSE	FALSE	FALSE	FALSE	FALSE	FALSE	FALSE	FALSE	TRUE	FALSE	TRUE	FALSE
US-CO-16	-627.491	-634.959	-643.688	-640.16	-630.819	1987	0.243	0.676	1986	1989	1972	0.008	NA	NA	NA	2004	0.229	0.78	2004	2010	2001	0.254	0.898	1998	2002	TRUE	FALSE	FALSE	TRUE	TRUE	TRUE	TRUE	TRUE	TRUE	TRUE	FALSE	FALSE	FALSE	FALSE	TRUE	FALSE	FALSE	FALSE	TRUE	FALSE	TRUE	TRUE
US-CO-18	-434.402	-428.446	-426.387	-426.387	-434.822	1987	0.313	0.846	1985	1988	1972	0.01	NA	NA	NA	2004	0.07	0.07	2004	2004	1998	0.143	0.468	1997	2000	TRUE	FALSE	FALSE	FALSE	FALSE	FALSE	FALSE	TRUE	FALSE	TRUE	FALSE	FALSE	FALSE	FALSE	FALSE	FALSE	FALSE	FALSE	TRUE	FALSE	TRUE	TRUE
US-CT-30	-660.945	-665.743	-658.695	-660.876	-657.981	1985	0.083	0.222	1983	1985	1974	0.021	NA	NA	NA	1985	0.171	0.756	1983	1988	1976	0.031	NA	NA	NA	FALSE	FALSE	TRUE	FALSE	TRUE	FALSE	TRUE	TRUE	FALSE	FALSE	TRUE	FALSE	FALSE	TRUE	TRUE	TRUE	FALSE	TRUE	FALSE	TRUE	FALSE	TRUE
US-DE-30	-656.628	-670.903	-652.279	-655.939	-652.288	1983	0.117	0.309	1982	1984	1975	0.064	NA	NA	NA	1981	0.065	NA	NA	NA	1975	0.068	0.068	1975	1975	FALSE	FALSE	TRUE	TRUE	TRUE	FALSE	TRUE	TRUE	FALSE	FALSE	TRUE	FALSE	TRUE	FALSE	TRUE	FALSE	FALSE	TRUE	FALSE	TRUE	FALSE	TRUE
US-FL-27	-566.181	-568.836	-569.51	-562.046	-574.737	1986	0.198	0.706	1984	1988	1973	0.006	NA	NA	NA	1991	0.016	NA	NA	NA	1975	0.067	NA	NA	NA	TRUE	FALSE	TRUE	TRUE	FALSE	FALSE	TRUE	TRUE	FALSE	FALSE	TRUE	FALSE	TRUE	FALSE	FALSE	FALSE	FALSE	FALSE	FALSE	TRUE	FALSE	TRUE
US-FL-31	-273.653	-269.096	-272.81	-272.487	-274.576	1993	0.248	0.767	1992	1995	1972	0.007	NA	NA	NA	2007	0.018	NA	NA	NA	1976	0.035	NA	NA	NA	TRUE	FALSE	TRUE	TRUE	FALSE	FALSE	FALSE	FALSE	FALSE	FALSE	FALSE	FALSE	TRUE	FALSE	FALSE	FALSE	FALSE	FALSE	FALSE	TRUE	FALSE	TRUE
US-GA-27	-743.728	-740.632	-742.616	-737.528	-746.971	1985	0.259	0.852	1983	1987	1972	0.009	NA	NA	NA	1987	0.11	0.295	1987	1989	1975	0.117	0.28	1974	1976	TRUE	FALSE	TRUE	TRUE	FALSE	FALSE	TRUE	TRUE	FALSE	FALSE	TRUE	FALSE	TRUE	FALSE	FALSE	FALSE	FALSE	TRUE	FALSE	TRUE	FALSE	TRUE
US-GA-28	-668.396	-673.636	-679.067	-667.145	-680.086	1985	0.205	0.787	1983	1987	1975	0.007	NA	NA	NA	1992	0.009	NA	NA	NA	1973	0.028	NA	NA	NA	FALSE	TRUE	TRUE	TRUE	FALSE	FALSE	TRUE	TRUE	FALSE	FALSE	TRUE	FALSE	TRUE	FALSE	FALSE	FALSE	FALSE	TRUE	FALSE	TRUE	FALSE	TRUE
US-GA-29	-764.072	-770.216	-771.201	-763.637	-773.638	1984	0.213	0.839	1982	1986	1975	0.008	NA	NA	NA	1989	0.03	NA	NA	NA	1975	0.129	0.23	1974	1975	FALSE	TRUE	TRUE	TRUE	FALSE	FALSE	TRUE	TRUE	FALSE	FALSE	TRUE	FALSE	TRUE	FALSE	FALSE	FALSE	FALSE	TRUE	FALSE	TRUE	FALSE	TRUE
US-IA-11	-382.031	-379.808	-380.075	-380.642	-381.428	1982	0.228	0.767	1980	1984	1975	0.006	NA	NA	NA	1979	0.026	NA	NA	NA	1976	0.038	NA	NA	NA	FALSE	FALSE	TRUE	TRUE	FALSE	FALSE	TRUE	TRUE	FALSE	FALSE	TRUE	FALSE	FALSE	FALSE	FALSE	FALSE	FALSE	FALSE	FALSE	TRUE	FALSE	TRUE
US-IA-22	-821.847	-813.928	-811.615	-815.509	-819.22	1983	0.297	0.891	1982	1986	1972	0.006	NA	NA	NA	1979	0.039	NA	NA	NA	1976	0.081	0.081	1976	1976	TRUE	TRUE	TRUE	TRUE	TRUE	FALSE	TRUE	TRUE	FALSE	FALSE	TRUE	FALSE	FALSE	FALSE	TRUE	FALSE	FALSE	TRUE	FALSE	TRUE	TRUE	TRUE
US-ID-10	-717.982	-708.231	-714.254	-725.712	-706.435	1987	0.11	0.192	1986	1987	1972	0.007	NA	NA	NA	2008	0.171	0.491	2006	2009	2000	0.255	0.918	1997	2002	TRUE	FALSE	FALSE	FALSE	TRUE	TRUE	TRUE	TRUE	TRUE	TRUE	FALSE	FALSE	FALSE	FALSE	TRUE	FALSE	FALSE	FALSE	FALSE	FALSE	TRUE	TRUE
US-ID-9	-587.016	-580.227	-587.716	-595.637	-578.513	1987	0.08	0.08	1987	1987	2004	0.012	NA	NA	NA	1993	0.105	0.185	1992	1993	1999	0.212	0.896	1996	2000	TRUE	FALSE	FALSE	FALSE	TRUE	TRUE	TRUE	TRUE	FALSE	TRUE	FALSE	FALSE	FALSE	FALSE	TRUE	FALSE	FALSE	FALSE	FALSE	FALSE	TRUE	TRUE
US-IL-22	-902.603	-902.037	-902.311	-900.37	-904.388	1983	0.4	0.851	1982	1985	1972	0.008	NA	NA	NA	1979	0.088	0.166	1978	1979	1976	0.155	0.483	1973	1976	FALSE	TRUE	TRUE	TRUE	TRUE	FALSE	TRUE	TRUE	FALSE	FALSE	TRUE	FALSE	TRUE	FALSE	TRUE	FALSE	FALSE	TRUE	FALSE	TRUE	FALSE	TRUE
US-IL-23	-358.813	-360.938	-363.699	-358.246	-364.039	1983	0.236	0.822	1982	1986	1972	0.007	NA	NA	NA	1983	0.029	NA	NA	NA	1974	0.101	0.272	1974	1976	FALSE	FALSE	TRUE	FALSE	FALSE	FALSE	TRUE	TRUE	FALSE	FALSE	TRUE	FALSE	FALSE	FALSE	FALSE	FALSE	FALSE	FALSE	FALSE	FALSE	FALSE	TRUE
US-IL-24	-769.804	-774.236	-775.303	-772.117	-774.203	1983	0.242	0.856	1981	1986	1972	0.01	NA	NA	NA	1978	0.141	0.241	1978	1979	1976	0.201	0.295	1975	1976	FALSE	TRUE	TRUE	TRUE	TRUE	FALSE	TRUE	TRUE	FALSE	FALSE	TRUE	FALSE	TRUE	FALSE	FALSE	FALSE	FALSE	TRUE	FALSE	TRUE	FALSE	TRUE
US-IN-22	-727.567	-733.283	-726.642	-725.318	-729.44	1983	0.342	0.845	1982	1985	1974	0.007	NA	NA	NA	1979	0.058	NA	NA	NA	1976	0.088	0.161	1975	1976	FALSE	FALSE	TRUE	TRUE	FALSE	FALSE	TRUE	TRUE	FALSE	FALSE	TRUE	FALSE	TRUE	FALSE	TRUE	FALSE	FALSE	TRUE	FALSE	TRUE	FALSE	TRUE
US-IN-23	-493.552	-497.589	-491.98	-494.887	-491.849	1983	0.265	0.785	1981	1985	1974	0.007	NA	NA	NA	1979	0.06	NA	NA	NA	1976	0.129	0.206	1975	1976	FALSE	FALSE	TRUE	TRUE	TRUE	FALSE	TRUE	TRUE	FALSE	FALSE	TRUE	FALSE	FALSE	FALSE	TRUE	FALSE	FALSE	FALSE	FALSE	TRUE	FALSE	TRUE
US-IN-24	-821.36	-828.284	-826.242	-821.119	-824.351	1983	0.256	0.832	1982	1986	1972	0.01	NA	NA	NA	1978	0.121	0.217	1978	1979	1976	0.152	0.234	1975	1976	FALSE	TRUE	TRUE	TRUE	TRUE	FALSE	TRUE	TRUE	FALSE	FALSE	TRUE	FALSE	TRUE	FALSE	TRUE	FALSE	FALSE	TRUE	FALSE	TRUE	FALSE	TRUE
US-KS-18	NA	NA	NA	NA	NA	NA	NA	NA	NA	NA	NA	NA	NA	NA	NA	NA	NA	NA	NA	NA	NA	NA	NA	NA	NA	FALSE	FALSE	FALSE	FALSE	FALSE	FALSE	FALSE	FALSE	FALSE	FALSE	FALSE	FALSE	FALSE	FALSE	FALSE	FALSE	FALSE	FALSE	FALSE	FALSE	FALSE	FALSE
US-KS-19	-726.107	-726.799	-724.618	-725.417	-725.1	1985	0.184	0.739	1982	1987	1997	0.01	NA	NA	NA	2004	0.048	NA	NA	NA	2002	0.198	0.604	2000	2003	TRUE	FALSE	TRUE	TRUE	FALSE	FALSE	TRUE	TRUE	FALSE	FALSE	TRUE	FALSE	FALSE	FALSE	FALSE	FALSE	FALSE	TRUE	TRUE	TRUE	TRUE	TRUE
US-KS-22	-733.26	-738.35	-731.777	-732.086	-733.369	1985	0.115	0.472	1983	1987	1990	0.012	NA	NA	NA	1978	0.049	NA	NA	NA	1976	0.095	0.095	1976	1976	TRUE	FALSE	TRUE	TRUE	FALSE	FALSE	TRUE	TRUE	FALSE	FALSE	TRUE	FALSE	FALSE	FALSE	FALSE	FALSE	FALSE	TRUE	FALSE	TRUE	TRUE	TRUE
US-KY-24	-984.672	-1000.25	-1000.85	-1004.3	-982.118	1987	0.157	0.879	1983	1989	1972	0.004	NA	NA	NA	1978	0.744	0.947	1978	1979	1976	0.835	0.937	1975	1976	TRUE	TRUE	TRUE	TRUE	TRUE	FALSE	TRUE	TRUE	FALSE	FALSE	TRUE	FALSE	TRUE	FALSE	TRUE	FALSE	FALSE	TRUE	FALSE	TRUE	FALSE	TRUE
US-KY-27	-561.28	-564.195	-562.722	-561.614	-560.968	1985	0.032	NA	NA	NA	1997	0.019	NA	NA	NA	1979	0.065	NA	NA	NA	1976	0.102	0.102	1976	1976	FALSE	FALSE	TRUE	TRUE	FALSE	FALSE	FALSE	TRUE	FALSE	FALSE	TRUE	FALSE	TRUE	FALSE	FALSE	FALSE	FALSE	TRUE	FALSE	TRUE	FALSE	TRUE
US-KY-28	-701.904	-715.787	-709.724	-705.802	-706.878	1983	0.18	0.685	1982	1986	1994	0.02	NA	NA	NA	1978	0.151	0.281	1978	1979	1976	0.225	0.311	1975	1976	FALSE	FALSE	TRUE	TRUE	FALSE	FALSE	TRUE	TRUE	FALSE	FALSE	TRUE	FALSE	TRUE	FALSE	FALSE	FALSE	FALSE	TRUE	FALSE	TRUE	FALSE	TRUE
US-LA-25	-551.055	-554.678	-553.328	-550.624	-554.434	1980	0.143	0.462	1978	1981	1972	0.01	NA	NA	NA	1998	0.059	NA	NA	NA	1974	0.102	0.178	1974	1975	FALSE	FALSE	TRUE	TRUE	FALSE	FALSE	FALSE	TRUE	FALSE	FALSE	TRUE	FALSE	TRUE	FALSE	FALSE	FALSE	FALSE	TRUE	FALSE	TRUE	FALSE	TRUE
US-LA-26	-528.171	-527.866	-528.474	-530.592	-526.048	1981	0.156	0.708	1979	1984	1972	0.01	NA	NA	NA	1978	0.028	NA	NA	NA	1974	0.086	0.228	1973	1975	FALSE	FALSE	TRUE	TRUE	FALSE	FALSE	FALSE	TRUE	FALSE	FALSE	TRUE	FALSE	TRUE	FALSE	FALSE	FALSE	FALSE	FALSE	FALSE	TRUE	FALSE	TRUE
US-LA-27	-468.022	-469.178	-475.173	-470.172	-472.59	1984	0.133	0.652	1981	1986	1972	0.008	NA	NA	NA	1972	0.006	NA	NA	NA	1973	0.032	NA	NA	NA	FALSE	FALSE	TRUE	TRUE	FALSE	FALSE	TRUE	TRUE	FALSE	FALSE	TRUE	FALSE	TRUE	FALSE	FALSE	FALSE	FALSE	FALSE	FALSE	TRUE	FALSE	TRUE
US-LA-37	NA	NA	NA	NA	NA	NA	NA	NA	NA	NA	NA	NA	NA	NA	NA	NA	NA	NA	NA	NA	NA	NA	NA	NA	NA	FALSE	FALSE	FALSE	FALSE	FALSE	FALSE	FALSE	FALSE	FALSE	FALSE	FALSE	FALSE	FALSE	FALSE	FALSE	FALSE	FALSE	FALSE	FALSE	FALSE	FALSE	FALSE
US-MA-14	-746.612	-760.584	-755.12	-757.257	-744.792	1986	0.028	NA	NA	NA	1972	0.008	NA	NA	NA	1984	0.346	0.84	1983	1987	1976	0.246	0.417	1975	1977	FALSE	FALSE	TRUE	FALSE	TRUE	FALSE	TRUE	TRUE	FALSE	FALSE	TRUE	FALSE	FALSE	TRUE	TRUE	TRUE	FALSE	TRUE	FALSE	TRUE	FALSE	TRUE
US-MA-30	-674.504	-678.709	-676.949	-679.983	-671.656	1985	0.04	NA	NA	NA	2010	0.013	NA	NA	NA	1984	0.225	0.806	1983	1988	1976	0.143	0.143	1976	1976	FALSE	FALSE	TRUE	FALSE	TRUE	FALSE	TRUE	TRUE	FALSE	FALSE	TRUE	FALSE	FALSE	FALSE	TRUE	TRUE	FALSE	TRUE	FALSE	TRUE	FALSE	TRUE
US-MD-28	-813.696	-823.29	-815.685	-815.135	-814.25	1983	0.223	0.748	1982	1986	1974	0.072	0.072	1974	1974	1984	0.121	0.747	1980	1987	1976	0.039	NA	NA	NA	FALSE	TRUE	TRUE	TRUE	TRUE	FALSE	TRUE	TRUE	FALSE	FALSE	TRUE	FALSE	TRUE	FALSE	TRUE	TRUE	FALSE	TRUE	FALSE	TRUE	FALSE	TRUE
US-MD-29	-831.438	-850.911	-837.326	-833.859	-834.099	1983	0.242	0.616	1981	1984	1975	0.278	0.502	1974	1975	1980	0.204	0.555	1979	1982	1976	0.226	0.431	1975	1977	FALSE	TRUE	TRUE	TRUE	TRUE	FALSE	TRUE	TRUE	FALSE	FALSE	TRUE	FALSE	TRUE	FALSE	TRUE	FALSE	FALSE	TRUE	FALSE	TRUE	FALSE	TRUE
US-MD-30	-788.561	-813.372	-794.75	-794.427	-789.201	1983	0.23	0.484	1982	1984	1975	0.249	0.475	1974	1976	1981	0.136	0.519	1980	1984	1976	0.234	0.45	1974	1976	FALSE	TRUE	TRUE	TRUE	TRUE	FALSE	TRUE	TRUE	FALSE	FALSE	TRUE	FALSE	TRUE	FALSE	TRUE	FALSE	FALSE	TRUE	FALSE	TRUE	FALSE	TRUE
US-ME-14	-570.712	-563.293	-564.629	-566.83	-566.931	1984	0.026	NA	NA	NA	2008	0.021	NA	NA	NA	1984	0.372	0.786	1983	2002	1979	0.136	0.23	1978	1979	FALSE	FALSE	TRUE	FALSE	TRUE	FALSE	FALSE	TRUE	TRUE	FALSE	TRUE	TRUE	FALSE	TRUE	FALSE	TRUE	FALSE	TRUE	FALSE	TRUE	FALSE	TRUE
US-MI-12	-776.684	-779.638	-782.15	-774.616	-783.368	1985	0.263	0.911	1983	1987	1972	0.006	NA	NA	NA	1992	0.042	NA	NA	NA	1976	0.064	NA	NA	NA	TRUE	TRUE	TRUE	TRUE	TRUE	FALSE	TRUE	TRUE	FALSE	FALSE	TRUE	FALSE	FALSE	FALSE	TRUE	TRUE	FALSE	TRUE	FALSE	TRUE	FALSE	TRUE
US-MI-23	-833.383	-838.741	-831.448	-830.824	-833.128	1983	0.342	0.833	1982	1985	1974	0.026	NA	NA	NA	1981	0.151	0.622	1979	1984	1975	0.238	0.664	1974	1976	FALSE	FALSE	TRUE	TRUE	TRUE	FALSE	TRUE	TRUE	FALSE	FALSE	TRUE	FALSE	TRUE	TRUE	TRUE	TRUE	FALSE	TRUE	FALSE	TRUE	FALSE	TRUE
US-MN-11	-698.138	-692.342	-692.479	-694.685	-696.055	1982	0.099	0.273	1981	1983	1972	0.009	NA	NA	NA	1993	0.029	NA	NA	NA	1975	0.037	NA	NA	NA	FALSE	FALSE	TRUE	TRUE	TRUE	FALSE	TRUE	TRUE	FALSE	FALSE	TRUE	FALSE	FALSE	TRUE	FALSE	TRUE	FALSE	TRUE	FALSE	TRUE	FALSE	TRUE
US-MN-12	-622.499	-614.485	-612.9	-616.274	-617.748	1986	0.15	0.625	1983	1987	2010	0.005	NA	NA	NA	1992	0.034	NA	NA	NA	1974	0.13	0.384	1973	1976	TRUE	FALSE	TRUE	TRUE	TRUE	FALSE	FALSE	TRUE	TRUE	FALSE	TRUE	TRUE	FALSE	TRUE	FALSE	TRUE	FALSE	TRUE	FALSE	TRUE	FALSE	TRUE
US-MN-22	-507.021	-504.35	-504.753	-505.89	-506.653	1983	0.245	0.779	1981	1985	1972	0.006	NA	NA	NA	1978	0.023	NA	NA	NA	1976	0.081	0.081	1976	1976	FALSE	FALSE	TRUE	TRUE	FALSE	FALSE	TRUE	TRUE	FALSE	FALSE	TRUE	FALSE	FALSE	FALSE	FALSE	FALSE	FALSE	TRUE	FALSE	TRUE	FALSE	TRUE
US-MN-23	-737.268	-735.468	-737.862	-738.583	-737.654	1983	0.08	0.23	1981	1983	1972	0.008	NA	NA	NA	1981	0.055	NA	NA	NA	1976	0.192	0.412	1974	1976	FALSE	FALSE	TRUE	TRUE	TRUE	FALSE	TRUE	TRUE	FALSE	FALSE	TRUE	FALSE	FALSE	TRUE	TRUE	TRUE	FALSE	TRUE	FALSE	TRUE	FALSE	TRUE
US-MO-22	-808.381	-805.954	-808.738	-805.289	-810.694	1984	0.22	0.881	1983	1987	1972	0.01	NA	NA	NA	1978	0.082	0.082	1978	1978	1976	0.136	0.136	1976	1976	TRUE	TRUE	TRUE	TRUE	TRUE	FALSE	TRUE	TRUE	FALSE	FALSE	TRUE	FALSE	TRUE	FALSE	FALSE	FALSE	FALSE	TRUE	FALSE	TRUE	FALSE	TRUE
US-MO-24	-841.463	-845.844	-852.264	-849.913	-843.491	1983	0.218	0.782	1982	1986	1972	0.006	NA	NA	NA	1978	0.332	0.672	1978	1980	1976	0.42	0.747	1974	1976	FALSE	TRUE	TRUE	TRUE	FALSE	FALSE	TRUE	TRUE	FALSE	FALSE	TRUE	FALSE	TRUE	FALSE	TRUE	FALSE	FALSE	TRUE	FALSE	TRUE	FALSE	TRUE
US-MO-26	-530.827	-538.308	-544.116	-534.646	-539.774	1983	0.18	0.782	1980	1985	1994	0.011	NA	NA	NA	1979	0.067	NA	NA	NA	1976	0.164	0.504	1973	1976	FALSE	FALSE	TRUE	TRUE	FALSE	FALSE	TRUE	TRUE	FALSE	FALSE	TRUE	FALSE	FALSE	FALSE	FALSE	FALSE	FALSE	FALSE	FALSE	TRUE	FALSE	TRUE
US-MS-26	-313.456	-312.075	-317.207	-314.234	-317.682	1981	0.121	0.619	1979	1984	1972	0.008	NA	NA	NA	1972	0.008	NA	NA	NA	2010	0.038	NA	NA	NA	FALSE	FALSE	TRUE	TRUE	FALSE	FALSE	FALSE	TRUE	FALSE	FALSE	FALSE	FALSE	FALSE	FALSE	FALSE	FALSE	FALSE	FALSE	FALSE	TRUE	FALSE	TRUE
US-MS-27	-792.928	-794.909	-793.038	-791.533	-794.167	1985	0.206	0.821	1983	1987	1972	0.007	NA	NA	NA	1978	0.012	NA	NA	NA	1974	0.11	0.211	1974	1975	TRUE	TRUE	TRUE	TRUE	FALSE	FALSE	TRUE	TRUE	FALSE	FALSE	TRUE	FALSE	TRUE	FALSE	FALSE	FALSE	FALSE	TRUE	FALSE	TRUE	FALSE	TRUE
US-MT-10	-866.409	-845.729	-854.603	-870.336	-854.005	1985	0.146	0.493	1984	1987	1972	0.008	NA	NA	NA	2010	0.151	0.367	1993	2010	2000	0.204	0.939	1996	2002	TRUE	FALSE	FALSE	FALSE	TRUE	TRUE	TRUE	TRUE	TRUE	TRUE	FALSE	FALSE	FALSE	FALSE	TRUE	TRUE	FALSE	FALSE	TRUE	FALSE	TRUE	TRUE
US-MT-11	-431.194	-424.864	-425.182	-432.11	-424.947	1987	0.237	0.744	1985	1989	2004	0.026	NA	NA	NA	1991	0.08	0.233	1990	1993	1995	0.041	NA	NA	NA	TRUE	FALSE	FALSE	FALSE	TRUE	FALSE	FALSE	TRUE	FALSE	FALSE	FALSE	FALSE	FALSE	FALSE	FALSE	TRUE	FALSE	FALSE	TRUE	FALSE	TRUE	TRUE
US-MT-17	-667.484	-662.421	-656.603	-668.547	-658.384	1987	0.089	0.241	1985	1987	2003	0.016	NA	NA	NA	1993	0.229	0.324	1992	1993	1997	0.146	0.438	1995	1998	TRUE	FALSE	FALSE	FALSE	TRUE	TRUE	TRUE	TRUE	FALSE	TRUE	FALSE	FALSE	FALSE	FALSE	TRUE	TRUE	FALSE	FALSE	TRUE	FALSE	TRUE	TRUE
US-NC-27	-709.995	-714.926	-718.214	-711.166	-717.417	1985	0.242	0.89	1983	1987	1972	0.008	NA	NA	NA	1989	0.028	NA	NA	NA	1975	0.268	0.648	1974	1976	TRUE	TRUE	TRUE	TRUE	FALSE	FALSE	TRUE	TRUE	FALSE	FALSE	TRUE	FALSE	TRUE	FALSE	FALSE	FALSE	FALSE	TRUE	FALSE	TRUE	FALSE	TRUE
US-NC-28	-629.451	-632.573	-633.073	-628.064	-633.956	1983	0.108	0.385	1982	1985	1991	0.006	NA	NA	NA	1989	0.026	NA	NA	NA	1975	0.036	NA	NA	NA	FALSE	FALSE	TRUE	FALSE	TRUE	FALSE	TRUE	TRUE	FALSE	FALSE	TRUE	FALSE	TRUE	FALSE	TRUE	FALSE	FALSE	TRUE	FALSE	TRUE	FALSE	TRUE
US-NC-29	-727.315	-737.238	-736.614	-726.731	-735.352	1984	0.23	0.824	1983	1987	1973	0.005	NA	NA	NA	1981	0.019	NA	NA	NA	1974	0.198	0.613	1973	1976	FALSE	TRUE	TRUE	TRUE	FALSE	FALSE	TRUE	TRUE	FALSE	FALSE	TRUE	FALSE	TRUE	FALSE	FALSE	FALSE	FALSE	TRUE	FALSE	TRUE	FALSE	TRUE
US-ND-11	-745.879	-729.965	-727.446	-729.06	-745.963	1981	0.172	0.565	1981	1984	2010	0.012	NA	NA	NA	1993	0.026	NA	NA	NA	2006	0.017	NA	NA	NA	FALSE	FALSE	TRUE	TRUE	TRUE	FALSE	TRUE	TRUE	FALSE	FALSE	TRUE	FALSE	FALSE	TRUE	TRUE	TRUE	FALSE	TRUE	TRUE	TRUE	TRUE	TRUE
US-ND-17	-402.167	-402.65	-396.134	-399.185	-400.811	1987	0.192	0.547	1985	1988	2010	0.031	NA	NA	NA	1979	0.109	0.621	1976	1993	1996	0.061	NA	NA	NA	TRUE	FALSE	FALSE	FALSE	FALSE	FALSE	FALSE	TRUE	FALSE	FALSE	FALSE	FALSE	FALSE	FALSE	TRUE	TRUE	FALSE	FALSE	TRUE	FALSE	TRUE	TRUE
US-NE-11	-277.347	-282.081	-278.003	-278.393	-277.587	1985	0.141	0.651	1982	1987	1972	0.008	NA	NA	NA	1983	0.032	NA	NA	NA	1997	0.06	NA	NA	NA	TRUE	FALSE	FALSE	FALSE	FALSE	FALSE	TRUE	TRUE	FALSE	FALSE	FALSE	FALSE	FALSE	FALSE	FALSE	FALSE	FALSE	FALSE	FALSE	FALSE	TRUE	TRUE
US-NE-18	-343.372	-343.395	-341.615	-342.373	-342.035	1987	0.332	0.887	1985	1989	2003	0.09	0.161	2002	2003	1983	0.062	NA	NA	NA	1998	0.12	0.508	1997	2001	TRUE	FALSE	FALSE	FALSE	FALSE	FALSE	FALSE	TRUE	FALSE	FALSE	FALSE	FALSE	FALSE	FALSE	FALSE	FALSE	FALSE	FALSE	TRUE	FALSE	TRUE	TRUE
US-NE-19	-573.017	-569.076	-572.225	-571.707	-573.447	1987	0.263	0.886	1984	1988	1972	0.007	NA	NA	NA	2009	0.015	NA	NA	NA	2000	0.033	NA	NA	NA	TRUE	FALSE	TRUE	FALSE	TRUE	FALSE	TRUE	TRUE	FALSE	FALSE	FALSE	FALSE	FALSE	FALSE	TRUE	FALSE	FALSE	FALSE	FALSE	TRUE	TRUE	TRUE
US-NE-22	-559.14	-554.987	-556.76	-554.34	-561.686	1983	0.153	0.687	1980	1985	1972	0.008	NA	NA	NA	2009	0.026	NA	NA	NA	1974	0.063	NA	NA	NA	FALSE	FALSE	TRUE	TRUE	FALSE	FALSE	TRUE	TRUE	FALSE	FALSE	TRUE	FALSE	FALSE	FALSE	FALSE	FALSE	FALSE	TRUE	FALSE	TRUE	TRUE	TRUE
US-NH-14	-757.048	-774.031	-772.755	-774.327	-755.195	1983	0.03	NA	NA	NA	1972	0.011	NA	NA	NA	1984	0.568	0.867	1983	1985	1976	0.322	0.861	1976	1979	FALSE	FALSE	TRUE	FALSE	TRUE	FALSE	TRUE	TRUE	TRUE	FALSE	TRUE	TRUE	FALSE	TRUE	TRUE	TRUE	FALSE	TRUE	FALSE	TRUE	FALSE	TRUE
US-NH-30	-563.444	-577.309	-565.457	-570.704	-558.208	1986	0.094	0.246	1984	1986	1981	0.006	NA	NA	NA	1984	0.164	0.397	1983	1988	1976	0.138	0.212	1976	1977	FALSE	FALSE	TRUE	FALSE	TRUE	FALSE	TRUE	TRUE	FALSE	FALSE	TRUE	FALSE	FALSE	TRUE	TRUE	TRUE	FALSE	TRUE	FALSE	TRUE	FALSE	TRUE
US-NJ-28	-678.589	-688.13	-678.693	-681.491	-674.399	1984	0.107	0.304	1983	1985	1975	0.028	NA	NA	NA	1984	0.158	0.869	1983	1989	1976	0.139	0.333	1974	1976	FALSE	FALSE	TRUE	FALSE	TRUE	FALSE	TRUE	TRUE	FALSE	FALSE	TRUE	FALSE	FALSE	FALSE	TRUE	TRUE	FALSE	TRUE	FALSE	TRUE	FALSE	TRUE
US-NJ-29	-579.825	-596.088	-585.547	-586.033	-579.971	1984	0.178	0.596	1983	1986	1975	0.024	NA	NA	NA	1983	0.193	0.729	1981	1985	1976	0.268	0.635	1974	1977	FALSE	FALSE	TRUE	FALSE	TRUE	FALSE	TRUE	TRUE	FALSE	FALSE	TRUE	FALSE	FALSE	FALSE	TRUE	FALSE	FALSE	TRUE	FALSE	TRUE	FALSE	TRUE
US-NJ-30	-588.333	-600.227	-584.756	-587.842	-583.997	1983	0.093	0.172	1983	1984	1975	0.024	NA	NA	NA	1981	0.066	NA	NA	NA	1976	0.14	0.22	1975	1976	FALSE	FALSE	TRUE	TRUE	TRUE	FALSE	TRUE	TRUE	FALSE	FALSE	TRUE	FALSE	TRUE	FALSE	FALSE	FALSE	FALSE	TRUE	FALSE	TRUE	FALSE	TRUE
US-NM-16	-454.214	-455.609	-459.937	-462.99	-450.932	1987	0.151	0.363	1986	1988	1972	0.009	NA	NA	NA	2010	0.157	0.356	2008	2010	2000	0.208	0.864	1997	2002	TRUE	FALSE	FALSE	TRUE	TRUE	TRUE	TRUE	TRUE	TRUE	TRUE	FALSE	FALSE	FALSE	FALSE	FALSE	FALSE	FALSE	FALSE	TRUE	FALSE	TRUE	FALSE
US-NM-18	-334.39	-326.699	-330.208	-326.72	-336.319	1987	0.358	0.924	1985	1989	1973	0.014	NA	NA	NA	1974	0.037	NA	NA	NA	1999	0.158	0.723	1996	2001	TRUE	FALSE	FALSE	FALSE	FALSE	FALSE	FALSE	TRUE	FALSE	TRUE	FALSE	FALSE	FALSE	FALSE	FALSE	FALSE	FALSE	FALSE	TRUE	FALSE	TRUE	FALSE
US-NM-34	NA	NA	NA	NA	NA	NA	NA	NA	NA	NA	NA	NA	NA	NA	NA	NA	NA	NA	NA	NA	NA	NA	NA	NA	NA	FALSE	FALSE	FALSE	FALSE	FALSE	FALSE	FALSE	FALSE	FALSE	FALSE	FALSE	FALSE	FALSE	FALSE	FALSE	FALSE	FALSE	FALSE	FALSE	FALSE	FALSE	FALSE
US-NM-35	-302.544	-296.442	-294.512	-295.938	-302.472	1987	0.294	0.719	1986	1989	1973	0.013	NA	NA	NA	2010	0.088	0.16	2009	2010	1999	0.134	0.539	1997	2001	TRUE	FALSE	FALSE	FALSE	FALSE	TRUE	FALSE	TRUE	FALSE	TRUE	FALSE	FALSE	FALSE	FALSE	FALSE	FALSE	FALSE	FALSE	TRUE	FALSE	TRUE	FALSE
US-NV-9	-350.885	-349.465	-348.425	-347.256	-351.104	1987	0.266	0.712	1985	1988	1972	0.008	NA	NA	NA	1980	0.03	NA	NA	NA	1991	0.059	NA	NA	NA	TRUE	FALSE	FALSE	FALSE	FALSE	FALSE	TRUE	TRUE	FALSE	FALSE	FALSE	FALSE	FALSE	FALSE	FALSE	FALSE	FALSE	FALSE	TRUE	FALSE	TRUE	FALSE
US-NY-13	-902.647	-912.973	-907.311	-910.809	-897.398	1983	0.046	NA	NA	NA	1975	0.02	NA	NA	NA	1984	0.468	0.798	1983	1985	1976	0.32	0.913	1975	1979	FALSE	FALSE	TRUE	TRUE	TRUE	FALSE	TRUE	TRUE	FALSE	FALSE	TRUE	FALSE	FALSE	TRUE	TRUE	TRUE	FALSE	TRUE	FALSE	TRUE	FALSE	TRUE
US-NY-14	-601.261	-603.356	-602.813	-603.906	-600.251	1986	0.065	NA	NA	NA	2010	0.012	NA	NA	NA	1984	0.306	0.698	1983	1986	1976	0.113	0.113	1976	1976	FALSE	FALSE	TRUE	FALSE	TRUE	FALSE	FALSE	TRUE	FALSE	FALSE	TRUE	FALSE	FALSE	TRUE	FALSE	TRUE	FALSE	TRUE	FALSE	TRUE	FALSE	TRUE
US-NY-28	-803.566	-813.121	-807.179	-811.022	-801.532	1985	0.038	NA	NA	NA	1975	0.042	NA	NA	NA	1984	0.215	0.877	1983	1988	1976	0.272	0.459	1975	1976	FALSE	FALSE	TRUE	FALSE	TRUE	FALSE	TRUE	TRUE	FALSE	FALSE	TRUE	FALSE	FALSE	TRUE	TRUE	TRUE	FALSE	TRUE	FALSE	TRUE	FALSE	TRUE
US-NY-30	-388.614	-390.905	-384.717	-387.963	-384.876	1984	0.071	0.071	1984	1984	1974	0.016	NA	NA	NA	1982	0.094	0.273	1981	1983	1976	0.178	0.342	1975	1977	FALSE	FALSE	TRUE	TRUE	TRUE	FALSE	FALSE	TRUE	FALSE	FALSE	TRUE	FALSE	FALSE	FALSE	FALSE	FALSE	FALSE	TRUE	FALSE	TRUE	FALSE	TRUE
US-OH-13	-738.114	-739.25	-739.051	-743.209	-734.71	1984	0.183	0.722	1983	1987	1974	0.039	NA	NA	NA	1989	0.181	0.781	1986	1991	1973	0.017	NA	NA	NA	FALSE	FALSE	TRUE	TRUE	TRUE	FALSE	TRUE	TRUE	FALSE	FALSE	TRUE	FALSE	TRUE	FALSE	TRUE	TRUE	FALSE	TRUE	FALSE	TRUE	FALSE	TRUE
US-OH-22	-833.232	-843.624	-835.567	-839.225	-829.123	1986	0.228	0.862	1983	1987	1974	0.031	NA	NA	NA	1979	0.277	0.748	1978	1981	1976	0.43	0.757	1974	1976	TRUE	FALSE	TRUE	TRUE	TRUE	FALSE	TRUE	TRUE	FALSE	FALSE	TRUE	FALSE	TRUE	FALSE	TRUE	FALSE	FALSE	TRUE	FALSE	TRUE	FALSE	TRUE
US-OH-28	-853.546	-867.282	-857.553	-857.937	-853.738	1983	0.278	0.827	1982	1986	1974	0.253	0.376	1974	1975	1979	0.244	0.558	1979	1981	1976	0.332	0.538	1975	1977	FALSE	TRUE	TRUE	TRUE	TRUE	FALSE	TRUE	TRUE	FALSE	FALSE	TRUE	FALSE	TRUE	FALSE	TRUE	FALSE	FALSE	TRUE	FALSE	TRUE	FALSE	TRUE
US-OK-18	NA	NA	NA	NA	NA	NA	NA	NA	NA	NA	NA	NA	NA	NA	NA	NA	NA	NA	NA	NA	NA	NA	NA	NA	NA	FALSE	FALSE	FALSE	FALSE	FALSE	FALSE	FALSE	FALSE	FALSE	FALSE	FALSE	FALSE	FALSE	FALSE	FALSE	FALSE	FALSE	FALSE	FALSE	FALSE	FALSE	FALSE
US-OK-19	-690.309	-684.874	-693.276	-689.109	-693.73	1985	0.206	0.866	1983	1988	1972	0.009	NA	NA	NA	1978	0.029	NA	NA	NA	1974	0.094	0.341	1973	1976	TRUE	FALSE	TRUE	FALSE	FALSE	FALSE	TRUE	TRUE	FALSE	FALSE	TRUE	FALSE	FALSE	FALSE	FALSE	FALSE	FALSE	TRUE	FALSE	TRUE	TRUE	TRUE
US-OK-21	-713.861	-710.018	-716.573	-712.382	-717.669	1985	0.275	0.88	1983	1987	1972	0.008	NA	NA	NA	1978	0.021	NA	NA	NA	1974	0.081	0.081	1974	1974	TRUE	FALSE	TRUE	TRUE	FALSE	FALSE	TRUE	TRUE	FALSE	FALSE	TRUE	FALSE	FALSE	FALSE	FALSE	FALSE	FALSE	TRUE	FALSE	TRUE	TRUE	TRUE
US-OK-22	-614.92	-613.135	-617.218	-612.517	-619.511	1985	0.198	0.804	1982	1987	1972	0.006	NA	NA	NA	1978	0.019	NA	NA	NA	1973	0.062	NA	NA	NA	TRUE	FALSE	TRUE	TRUE	FALSE	FALSE	TRUE	TRUE	FALSE	FALSE	TRUE	FALSE	FALSE	FALSE	FALSE	FALSE	FALSE	TRUE	FALSE	TRUE	FALSE	TRUE
US-OK-24	NA	NA	NA	NA	NA	NA	NA	NA	NA	NA	NA	NA	NA	NA	NA	NA	NA	NA	NA	NA	NA	NA	NA	NA	NA	FALSE	FALSE	FALSE	FALSE	FALSE	FALSE	FALSE	FALSE	FALSE	FALSE	FALSE	FALSE	FALSE	FALSE	FALSE	FALSE	FALSE	FALSE	FALSE	FALSE	FALSE	FALSE
US-OK-25	-642.982	-641.345	-650.485	-644.66	-648.413	1984	0.24	0.916	1981	1986	1972	0.007	NA	NA	NA	1978	0.032	NA	NA	NA	1973	0.082	0.151	1973	1974	FALSE	FALSE	TRUE	TRUE	FALSE	FALSE	TRUE	TRUE	FALSE	FALSE	TRUE	FALSE	TRUE	FALSE	FALSE	FALSE	FALSE	TRUE	FALSE	TRUE	FALSE	TRUE
US-OR-10	-689.904	-699.227	-704.497	-706.281	-688.738	1987	0.028	NA	NA	NA	1972	0.012	NA	NA	NA	2008	0.24	0.74	2006	2010	2000	0.307	0.872	1999	2002	TRUE	FALSE	FALSE	FALSE	TRUE	TRUE	TRUE	TRUE	TRUE	TRUE	FALSE	FALSE	FALSE	FALSE	TRUE	FALSE	FALSE	FALSE	TRUE	FALSE	TRUE	TRUE
US-OR-5	-574.888	-578.03	-580.26	-581.385	-575.181	1987	0.022	NA	NA	NA	1972	0.014	NA	NA	NA	2010	0.102	0.178	2009	2010	2000	0.174	0.748	1996	2001	TRUE	FALSE	FALSE	TRUE	TRUE	TRUE	TRUE	TRUE	TRUE	TRUE	FALSE	FALSE	FALSE	FALSE	TRUE	FALSE	TRUE	FALSE	FALSE	FALSE	TRUE	FALSE
US-OR-9	-723.369	-721.231	-724.355	-728.327	-718.81	1987	0.023	NA	NA	NA	1972	0.011	NA	NA	NA	2008	0.134	0.426	2007	2010	2000	0.266	0.899	1997	2001	TRUE	FALSE	FALSE	FALSE	TRUE	TRUE	TRUE	TRUE	TRUE	TRUE	FALSE	FALSE	FALSE	FALSE	TRUE	FALSE	FALSE	FALSE	TRUE	FALSE	TRUE	TRUE
US-PA-13	-687.243	-676.004	-678.703	-684.886	-679.862	1983	0.157	0.61	1982	1986	1974	0.02	NA	NA	NA	1988	0.162	0.629	1985	1989	1975	0.015	NA	NA	NA	FALSE	FALSE	TRUE	TRUE	TRUE	FALSE	FALSE	TRUE	FALSE	FALSE	TRUE	FALSE	TRUE	TRUE	TRUE	TRUE	FALSE	TRUE	FALSE	TRUE	FALSE	TRUE
US-PA-28	-1082.77	-1088.6	-1085.1	-1081.43	-1087.28	1983	0.393	0.805	1982	1985	1975	0.279	0.606	1974	1976	1987	0.198	0.862	1984	1989	1976	0.014	NA	NA	NA	FALSE	TRUE	TRUE	TRUE	TRUE	FALSE	TRUE	TRUE	FALSE	FALSE	TRUE	FALSE	TRUE	TRUE	TRUE	TRUE	FALSE	TRUE	FALSE	TRUE	FALSE	TRUE
US-PA-29	-648.685	-666.544	-651.126	-651.422	-648.72	1983	0.154	0.46	1982	1985	1975	0.08	0.08	1975	1975	1983	0.208	0.708	1981	1985	1976	0.274	0.606	1974	1977	FALSE	FALSE	TRUE	TRUE	TRUE	FALSE	TRUE	TRUE	FALSE	FALSE	TRUE	FALSE	FALSE	FALSE	TRUE	FALSE	FALSE	TRUE	FALSE	TRUE	FALSE	TRUE
US-RI-30	NA	NA	NA	NA	NA	NA	NA	NA	NA	NA	NA	NA	NA	NA	NA	NA	NA	NA	NA	NA	NA	NA	NA	NA	NA	FALSE	FALSE	FALSE	FALSE	FALSE	FALSE	FALSE	FALSE	FALSE	FALSE	FALSE	FALSE	FALSE	FALSE	FALSE	FALSE	FALSE	FALSE	FALSE	FALSE	FALSE	FALSE
US-SC-27	-648.942	-661.688	-660.024	-652.985	-656.634	1985	0.24	0.931	1982	1987	1973	0.008	NA	NA	NA	1983	0.069	0.069	1983	1983	1975	0.275	0.679	1973	1976	TRUE	FALSE	TRUE	TRUE	FALSE	FALSE	TRUE	TRUE	FALSE	FALSE	TRUE	FALSE	TRUE	FALSE	FALSE	FALSE	FALSE	FALSE	FALSE	TRUE	FALSE	TRUE
US-SC-29	-667.673	-683.433	-682.004	-667.635	-682.593	1984	0.232	0.852	1982	1986	1972	0.007	NA	NA	NA	1987	0.02	NA	NA	NA	1975	0.116	0.358	1973	1976	FALSE	TRUE	TRUE	TRUE	FALSE	FALSE	TRUE	TRUE	FALSE	FALSE	TRUE	FALSE	TRUE	FALSE	FALSE	FALSE	FALSE	TRUE	FALSE	TRUE	FALSE	TRUE
US-SD-11	-424.339	-421.188	-422.521	-428.831	-418.162	1983	0.14	0.42	1981	1984	2004	0.026	NA	NA	NA	1993	0.371	0.739	1991	1993	1995	0.333	0.731	1994	1997	FALSE	FALSE	TRUE	TRUE	TRUE	FALSE	FALSE	TRUE	FALSE	FALSE	FALSE	FALSE	FALSE	FALSE	TRUE	TRUE	FALSE	FALSE	FALSE	FALSE	TRUE	TRUE
US-SD-17	-526.799	-517.587	-525.876	-529.369	-522.728	1987	0.035	NA	NA	NA	2003	0.038	NA	NA	NA	1993	0.443	0.695	1992	1994	1997	0.295	0.806	1995	1998	TRUE	FALSE	FALSE	FALSE	TRUE	TRUE	TRUE	TRUE	FALSE	TRUE	FALSE	FALSE	FALSE	FALSE	FALSE	FALSE	FALSE	FALSE	TRUE	FALSE	TRUE	TRUE
US-TN-24	-887.093	-890.187	-887.313	-888.415	-886.442	1986	0.084	0.312	1985	1988	1972	0.005	NA	NA	NA	1978	0.118	0.197	1978	1979	1976	0.154	0.243	1975	1976	TRUE	TRUE	TRUE	TRUE	FALSE	FALSE	TRUE	TRUE	FALSE	FALSE	TRUE	FALSE	TRUE	FALSE	FALSE	FALSE	FALSE	TRUE	FALSE	TRUE	FALSE	TRUE
US-TN-26	-551.413	-552.271	-560.007	-552.973	-557.456	1983	0.134	0.623	1980	1985	1972	0.008	NA	NA	NA	1979	0.014	NA	NA	NA	1974	0.079	0.22	1973	1975	FALSE	FALSE	TRUE	TRUE	FALSE	FALSE	TRUE	TRUE	FALSE	FALSE	TRUE	FALSE	TRUE	FALSE	FALSE	FALSE	FALSE	TRUE	FALSE	TRUE	FALSE	TRUE
US-TN-27	-797.036	-802.627	-810.817	-798.139	-809.383	1983	0.284	0.889	1981	1985	1972	0.007	NA	NA	NA	1978	0.108	0.193	1978	1979	1976	0.177	0.356	1974	1976	FALSE	TRUE	TRUE	TRUE	FALSE	FALSE	TRUE	TRUE	FALSE	FALSE	TRUE	FALSE	TRUE	FALSE	FALSE	FALSE	FALSE	TRUE	FALSE	TRUE	FALSE	TRUE
US-TN-28	-860.631	-862.71	-861.175	-861.084	-861.543	1987	0.151	0.679	1984	1989	1975	0.009	NA	NA	NA	1978	0.051	NA	NA	NA	1976	0.089	0.089	1976	1976	TRUE	TRUE	TRUE	TRUE	FALSE	FALSE	TRUE	TRUE	FALSE	FALSE	TRUE	FALSE	TRUE	FALSE	FALSE	FALSE	FALSE	TRUE	FALSE	TRUE	FALSE	TRUE
US-TX-18	-447.963	-451.829	-453.044	-448.653	-454.505	1987	0.359	0.953	1985	1989	1972	0.012	NA	NA	NA	1983	0.228	0.836	1980	2010	1991	0.014	NA	NA	NA	TRUE	FALSE	TRUE	FALSE	FALSE	FALSE	TRUE	TRUE	FALSE	FALSE	FALSE	FALSE	FALSE	FALSE	FALSE	FALSE	FALSE	FALSE	TRUE	FALSE	TRUE	TRUE
US-TX-19	-465.424	-458.113	-456.795	-460.558	-461.181	1987	0.38	0.925	1985	1988	1972	0.012	NA	NA	NA	2006	0.086	0.171	2006	2007	1972	0.009	NA	NA	NA	TRUE	FALSE	TRUE	FALSE	FALSE	FALSE	FALSE	TRUE	FALSE	FALSE	FALSE	FALSE	FALSE	FALSE	FALSE	FALSE	FALSE	TRUE	FALSE	TRUE	TRUE	TRUE
US-TX-20	-317.921	-312.523	-311.078	-318.449	-312.483	1987	0.341	0.874	1985	1988	1972	0.009	NA	NA	NA	2010	0.016	NA	NA	NA	1972	0.019	NA	NA	NA	TRUE	FALSE	TRUE	TRUE	FALSE	FALSE	FALSE	TRUE	FALSE	FALSE	TRUE	FALSE	FALSE	FALSE	FALSE	FALSE	FALSE	TRUE	FALSE	TRUE	FALSE	FALSE
US-TX-21	-656.954	-649.826	-654.669	-652.86	-659.564	1987	0.313	0.801	1985	1988	1972	0.006	NA	NA	NA	2004	0.25	0.671	2002	2005	1974	0.023	NA	NA	NA	TRUE	FALSE	TRUE	TRUE	FALSE	FALSE	TRUE	TRUE	FALSE	FALSE	TRUE	FALSE	FALSE	FALSE	FALSE	FALSE	FALSE	TRUE	FALSE	TRUE	TRUE	TRUE
US-TX-25	-655.484	-649.561	-652.639	-657.569	-650.672	1987	0.264	0.682	1985	1988	1972	0.012	NA	NA	NA	1999	0.125	0.649	1998	2003	1974	0.053	NA	NA	NA	TRUE	FALSE	TRUE	TRUE	FALSE	FALSE	FALSE	TRUE	FALSE	FALSE	TRUE	FALSE	TRUE	FALSE	FALSE	FALSE	FALSE	TRUE	FALSE	TRUE	FALSE	TRUE
US-TX-35	-252.347	-245.794	-245.744	-244.262	-254.649	1987	0.424	0.896	1985	1988	2002	0.015	NA	NA	NA	2010	0.064	NA	NA	NA	2000	0.098	0.349	1997	2000	TRUE	FALSE	FALSE	TRUE	FALSE	FALSE	FALSE	TRUE	FALSE	TRUE	FALSE	FALSE	FALSE	FALSE	FALSE	FALSE	FALSE	FALSE	TRUE	FALSE	TRUE	FALSE
US-TX-36	NA	NA	NA	NA	NA	NA	NA	NA	NA	NA	NA	NA	NA	NA	NA	NA	NA	NA	NA	NA	NA	NA	NA	NA	NA	FALSE	FALSE	FALSE	FALSE	FALSE	FALSE	FALSE	FALSE	FALSE	FALSE	FALSE	FALSE	FALSE	FALSE	FALSE	FALSE	FALSE	FALSE	FALSE	FALSE	FALSE	FALSE
US-TX-37	-359.836	-360.111	-358.786	-359.246	-359.454	1987	0.29	0.879	1984	1988	1972	0.012	NA	NA	NA	2004	0.042	NA	NA	NA	2010	0.012	NA	NA	NA	TRUE	FALSE	TRUE	TRUE	FALSE	FALSE	FALSE	TRUE	FALSE	FALSE	FALSE	FALSE	FALSE	FALSE	FALSE	FALSE	FALSE	FALSE	FALSE	TRUE	FALSE	TRUE
US-UT-16	-595.954	-593.733	-599.86	-602.56	-592.603	1987	0.176	0.486	1985	1988	1972	0.008	NA	NA	NA	2010	0.215	0.312	2009	2010	2000	0.273	0.903	1998	2002	TRUE	FALSE	FALSE	TRUE	TRUE	TRUE	TRUE	TRUE	TRUE	TRUE	FALSE	FALSE	FALSE	FALSE	TRUE	FALSE	FALSE	FALSE	TRUE	FALSE	TRUE	FALSE
US-UT-9	-318.6	-315.898	-315.787	-315.129	-318.886	1987	0.084	0.084	1987	1987	1972	0.016	NA	NA	NA	1980	0.054	NA	NA	NA	1991	0.06	NA	NA	NA	TRUE	FALSE	FALSE	FALSE	TRUE	TRUE	TRUE	TRUE	FALSE	FALSE	FALSE	FALSE	FALSE	FALSE	FALSE	FALSE	FALSE	FALSE	TRUE	FALSE	TRUE	FALSE
US-VA-27	-580.596	-587.904	-581.982	-580.42	-581.243	1984	0.135	0.577	1983	1987	2009	0.014	NA	NA	NA	1981	0.032	NA	NA	NA	1974	0.075	0.146	1974	1975	FALSE	TRUE	TRUE	TRUE	FALSE	FALSE	FALSE	TRUE	FALSE	FALSE	TRUE	FALSE	TRUE	FALSE	FALSE	FALSE	FALSE	TRUE	FALSE	TRUE	FALSE	TRUE
US-VA-28	-767.989	-776.889	-771.911	-766.674	-772.996	1984	0.223	0.827	1983	1987	1972	0.016	NA	NA	NA	1979	0.036	NA	NA	NA	1976	0.062	NA	NA	NA	FALSE	TRUE	TRUE	FALSE	TRUE	FALSE	TRUE	TRUE	FALSE	FALSE	TRUE	FALSE	TRUE	FALSE	TRUE	FALSE	FALSE	TRUE	FALSE	TRUE	FALSE	TRUE
US-VA-29	-781.345	-787.24	-782.759	-780.372	-783.849	1983	0.2	0.686	1982	1986	1975	0.026	NA	NA	NA	1978	0.065	NA	NA	NA	1975	0.09	0.178	1975	1976	FALSE	TRUE	TRUE	TRUE	TRUE	FALSE	TRUE	TRUE	FALSE	FALSE	TRUE	FALSE	TRUE	FALSE	FALSE	FALSE	FALSE	TRUE	FALSE	TRUE	FALSE	TRUE
US-VA-30	-488.529	-494.14	-487.922	-489.268	-487.259	1984	0.042	NA	NA	NA	2009	0.03	NA	NA	NA	1980	0.029	NA	NA	NA	1976	0.039	NA	NA	NA	FALSE	FALSE	TRUE	TRUE	FALSE	FALSE	FALSE	TRUE	FALSE	FALSE	TRUE	FALSE	TRUE	FALSE	FALSE	FALSE	FALSE	TRUE	FALSE	TRUE	FALSE	TRUE
US-VT-13	-394.793	-396.563	-392.1	-393.524	-393.331	1980	0.041	NA	NA	NA	2010	0.014	NA	NA	NA	1984	0.135	0.325	1983	1985	1976	0.099	0.099	1976	1976	FALSE	FALSE	FALSE	TRUE	TRUE	FALSE	FALSE	TRUE	FALSE	FALSE	TRUE	FALSE	FALSE	FALSE	FALSE	TRUE	FALSE	TRUE	FALSE	TRUE	FALSE	TRUE
US-VT-14	-721.657	-736.152	-734.518	-737.805	-719.052	1987	0.105	0.264	1986	1988	2009	0.012	NA	NA	NA	1984	0.542	0.873	1983	1985	1976	0.343	0.854	1975	1979	FALSE	FALSE	TRUE	FALSE	TRUE	FALSE	FALSE	TRUE	FALSE	FALSE	TRUE	FALSE	FALSE	TRUE	TRUE	TRUE	FALSE	TRUE	FALSE	TRUE	FALSE	TRUE
US-WA-10	-550.679	-551.394	-547.72	-549.056	-550.523	1988	0.03	NA	NA	NA	1972	0.008	NA	NA	NA	2007	0.031	NA	NA	NA	1999	0.173	0.646	1997	2001	TRUE	FALSE	FALSE	FALSE	TRUE	TRUE	TRUE	TRUE	FALSE	TRUE	FALSE	FALSE	FALSE	FALSE	TRUE	FALSE	TRUE	FALSE	FALSE	FALSE	TRUE	TRUE
US-WA-5	-561.785	-559.779	-565.206	-565.665	-562.498	2010	0.023	NA	NA	NA	1972	0.01	NA	NA	NA	2010	0.066	NA	NA	NA	2000	0.202	0.711	1998	2002	TRUE	FALSE	FALSE	FALSE	TRUE	TRUE	TRUE	TRUE	TRUE	TRUE	FALSE	FALSE	FALSE	FALSE	TRUE	FALSE	TRUE	FALSE	FALSE	FALSE	FALSE	FALSE
US-WA-9	-797.317	-779.256	-778.926	-792.116	-783.343	1986	0.034	NA	NA	NA	1972	0.012	NA	NA	NA	2008	0.175	0.577	2006	2010	2000	0.289	0.889	1998	2002	TRUE	FALSE	FALSE	FALSE	TRUE	TRUE	TRUE	TRUE	TRUE	TRUE	FALSE	FALSE	FALSE	FALSE	TRUE	FALSE	TRUE	FALSE	TRUE	FALSE	TRUE	TRUE
US-WI-12	-725.706	-738.111	-734.58	-730.283	-727.753	1984	0.296	0.913	1983	1987	1981	0.003	NA	NA	NA	1993	0.106	0.262	1992	1994	1976	0.618	0.906	1975	1976	TRUE	TRUE	TRUE	TRUE	TRUE	FALSE	TRUE	TRUE	FALSE	FALSE	TRUE	TRUE	FALSE	TRUE	FALSE	TRUE	FALSE	TRUE	FALSE	TRUE	FALSE	TRUE
US-WI-22	NA	NA	NA	NA	NA	NA	NA	NA	NA	NA	NA	NA	NA	NA	NA	NA	NA	NA	NA	NA	NA	NA	NA	NA	NA	FALSE	FALSE	FALSE	FALSE	FALSE	FALSE	FALSE	FALSE	FALSE	FALSE	FALSE	FALSE	FALSE	FALSE	FALSE	FALSE	FALSE	FALSE	FALSE	FALSE	FALSE	FALSE
US-WI-23	-877.213	-885.673	-895.244	-885.94	-884.657	1985	0.295	0.952	1983	1987	1982	0.003	NA	NA	NA	1991	0.134	0.567	1988	1993	1976	0.547	0.856	1975	1976	TRUE	TRUE	TRUE	TRUE	TRUE	FALSE	TRUE	TRUE	FALSE	FALSE	TRUE	FALSE	FALSE	TRUE	TRUE	TRUE	FALSE	TRUE	FALSE	TRUE	FALSE	TRUE
US-WV-28	-884.535	-895.28	-887.496	-886.238	-886.435	1983	0.201	0.553	1982	1985	1975	0.227	0.442	1974	1975	1989	0.148	0.663	1987	1992	1975	0.058	NA	NA	NA	FALSE	TRUE	TRUE	TRUE	TRUE	FALSE	TRUE	TRUE	FALSE	FALSE	TRUE	FALSE	TRUE	FALSE	TRUE	TRUE	FALSE	TRUE	FALSE	TRUE	FALSE	TRUE
US-WY-10	-801.202	-797.809	-805.781	-807.58	-799.428	1987	0.208	0.583	1985	1988	1972	0.006	NA	NA	NA	2010	0.236	0.528	2008	2010	2000	0.258	0.892	1998	2002	TRUE	FALSE	FALSE	FALSE	TRUE	TRUE	TRUE	TRUE	TRUE	TRUE	FALSE	FALSE	FALSE	FALSE	TRUE	TRUE	FALSE	FALSE	TRUE	FALSE	TRUE	TRUE
US-WY-16	NA	NA	NA	NA	NA	NA	NA	NA	NA	NA	NA	NA	NA	NA	NA	NA	NA	NA	NA	NA	NA	NA	NA	NA	NA	FALSE	FALSE	FALSE	FALSE	FALSE	FALSE	FALSE	FALSE	FALSE	FALSE	FALSE	FALSE	FALSE	FALSE	FALSE	FALSE	FALSE	FALSE	FALSE	FALSE	FALSE	FALSE
US-WY-17	-565.705	-566.791	-565.487	-566.658	-564.263	1985	0.199	0.873	1983	1988	1972	0.008	NA	NA	NA	1993	0.049	NA	NA	NA	1998	0.178	0.651	1997	2001	TRUE	FALSE	FALSE	FALSE	FALSE	FALSE	TRUE	TRUE	FALSE	TRUE	FALSE	FALSE	FALSE	FALSE	FALSE	TRUE	FALSE	FALSE	TRUE	FALSE	TRUE	TRUE
US-WY-18	-386.95	-386.011	-382.903	-385.272	-383.451	1987	0.307	0.858	1985	1989	2003	0.027	NA	NA	NA	2010	0.032	NA	NA	NA	2000	0.109	0.394	1998	2001	TRUE	FALSE	FALSE	FALSE	FALSE	FALSE	FALSE	TRUE	FALSE	TRUE	FALSE	FALSE	FALSE	FALSE	FALSE	FALSE	FALSE	FALSE	TRUE	FALSE	TRUE	TRUE
